# Supplementary material for: A methodology for estimating indoor sources contributing to PM2.5
Source: Royal Society of Chemistry journal article supplement (doi:10.1039/d4em00538d), 2024-01-01
Supplement: d4em00538d2.pdf [file d4em00538d2.pdf]

## Supplementary Information

for

### A methodology for estimating indoor sources contribution to PM<sub>2.5</sub>

Shiva Nourani<sup>1,2</sup>, Ana María Villalobos<sup>1</sup>, and Héctor Jorquera<sup>1,2\*</sup>

<sup>1</sup>Departamento de Ingeniería Química y Bioprocesos, Pontificia Universidad Católica de Chile, Avda. Vicuña Mackenna 4860, Santiago 7820436, Chile

<sup>2</sup>Center for Sustainable Urban Development (CEDEUS), Los Navegantes 1963, Providencia, Santiago 7520246, Chile

\*Corresponding author: [jorquera@uc.cl](mailto:jorquera@uc.cl)

## Figures

Figure S1: a) Maps showing schools (red) and monitoring stations(yellow) locations in Santiago b) Schools with lower R2 values according to distance to the nearest monitoring station in one zone

Figure S2: Comparison of outdoor sensor PM<sub>2.5</sub> data in S12 and S15 with reference monitoring station (daily averages).

Figure S3: projection of the PM<sub>2.5</sub> fuzzy clustering results for school outdoor, far and near classrooms, using (u,v) as independent variables. The size of the symbols is scaled by its membership value. Green: regional, red: secondary, purple: traffic, yellow: overnight-mix, blue: noise, brown: indoor-generated particles

Figure S4: Boxplot of Indoor-generated PM<sub>2.5</sub> (far and near classrooms) according to school type for all 19 schools

Figure S5: comparing outdoor and near classroom PM<sub>2.5</sub> clusters: a) Regional Source, b) Overnight mix Source, c) Traffic Source, d) Secondary source, e) Noise Cluster (Out: outdoor, N: near classrooms and 1 to 6 are the numbers of the clusters).

Figure S6: Polar plots for the fuzzy cluster solution for outdoor and indoor (far and near) PM<sub>2.5</sub> classroom measurements. Wind speed and wind direction are the polar variables. The left, center and right plots correspond to outdoor, far and near classrooms, respectively.

Figure S7: Polar plots for the fuzzy cluster solution for outdoor and indoor (far and near) PM<sub>2.5</sub> classroom measurements. Temperature and wind direction are the polar variables. The left, center and right plots correspond to outdoor, far and near classrooms, respectively.

Figure S8: PM<sub>2.5</sub> infiltration factor for near and far classrooms (a and b respectively) according to different clusters: reg cluster (regional), Overnight mix cluster (overnight), traffic cluster (tr) and secondary cluster (sec).

Figure S9: seasonal variability of F<sub>inf</sub> for different sources (fuzzy clusters) of PM<sub>2.5</sub>.

Figure S10: Source contributions of PM<sub>2.5</sub> by cluster in a) outdoor b) far classrooms c) near classrooms (µg/m<sup>3</sup>). The arrows show the highest value in each school cluster.

Figure S11: PM<sub>2.5</sub> contributions of different clusters according to seasons in outdoor (Out), far (F) and near (N) classrooms (µg/m<sup>3</sup>).

## Tables

Table S1: Adjusted R<sup>2</sup> for different pairwise comparisons

Table S2: adjusted R<sup>2</sup> for paired fuzzy clusters.

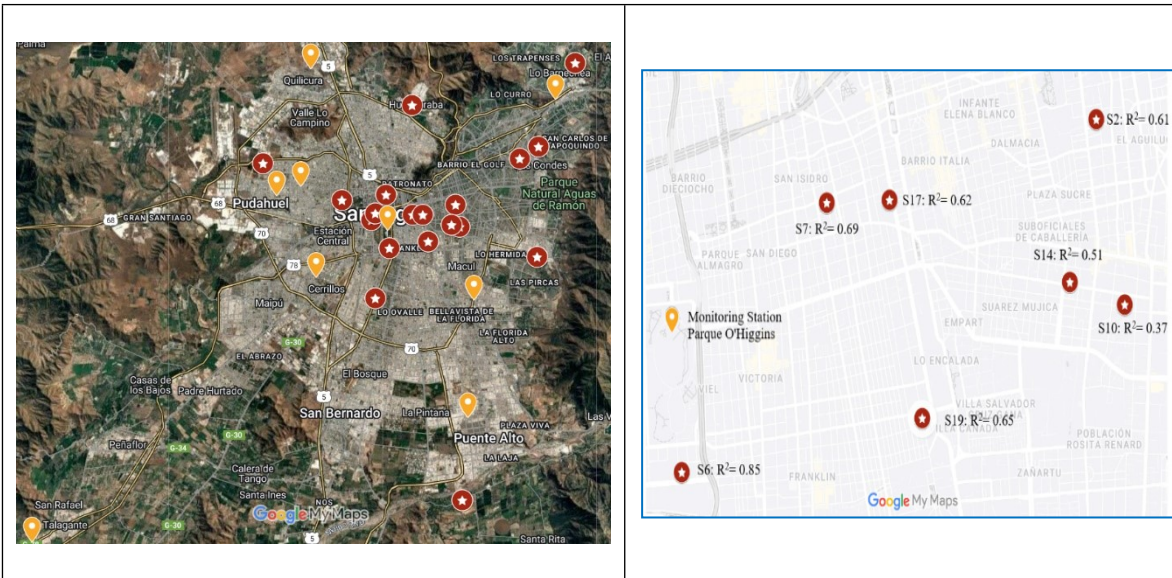

Figure S1: a) Maps showing schools (red) and monitoring stations(yellow) locations in Santiago. b) A subset of schools showing how  $R^2$  values (between reference monitor and outdoor sensor at school) change according to distance to the nearest reference monitor (Parque O'Higgins in this example).

S12

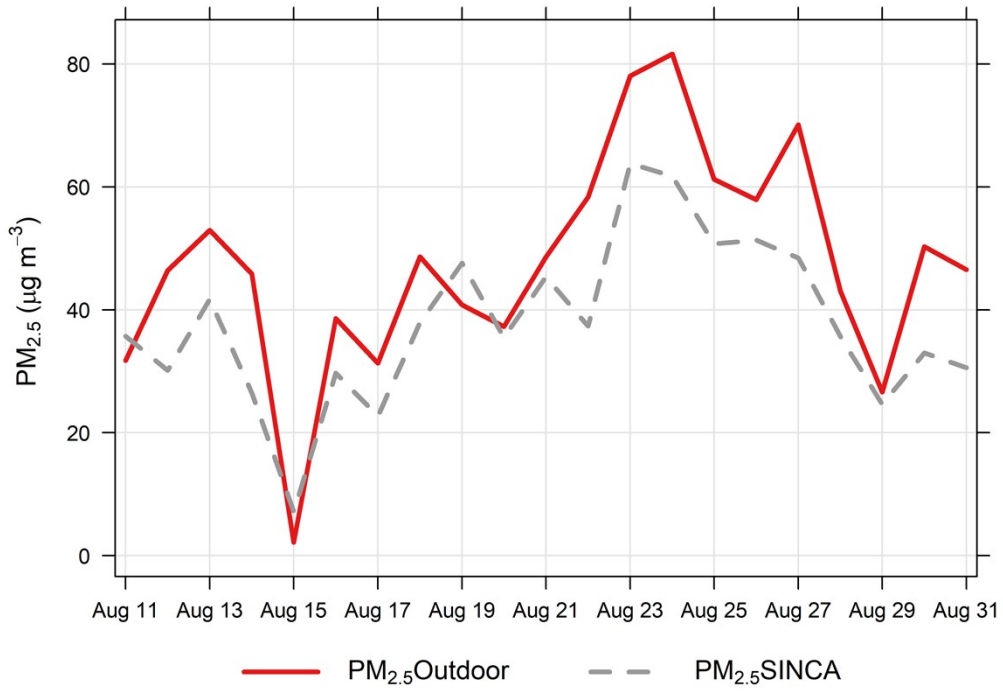

S15

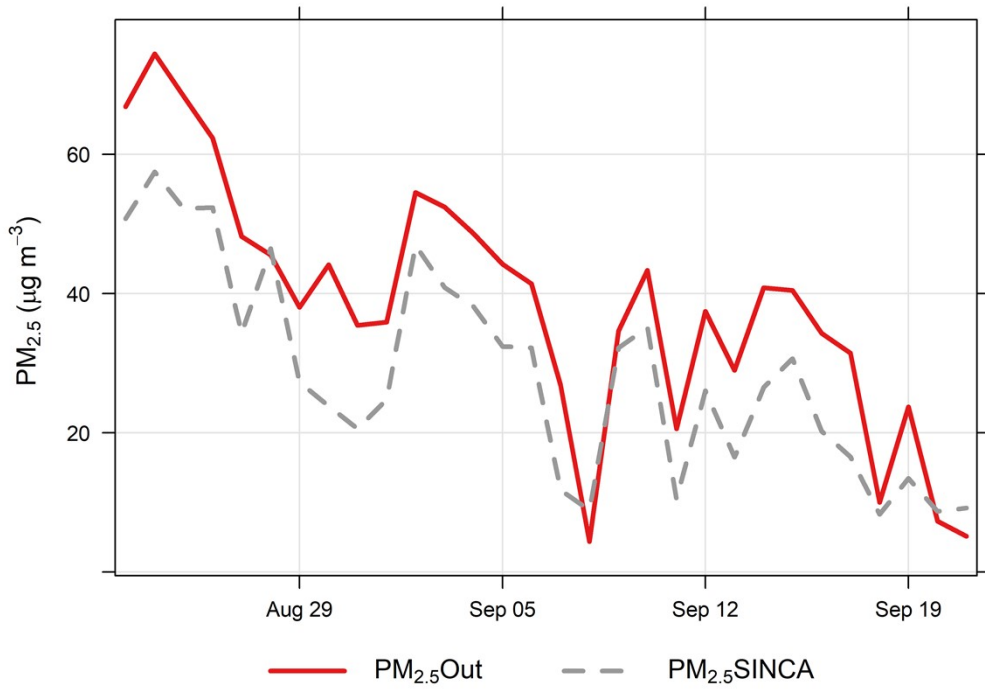

Figure S2

### Outdoor

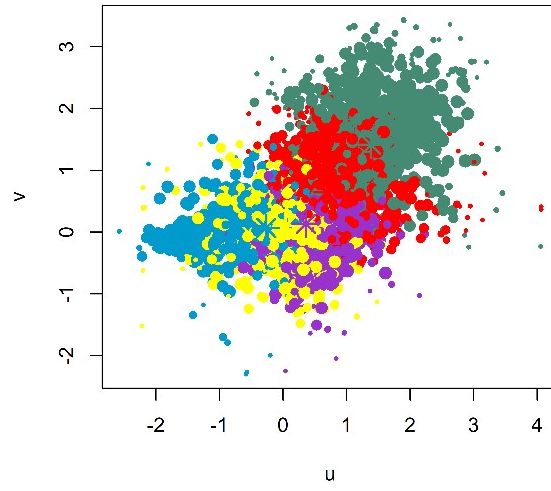

### Far

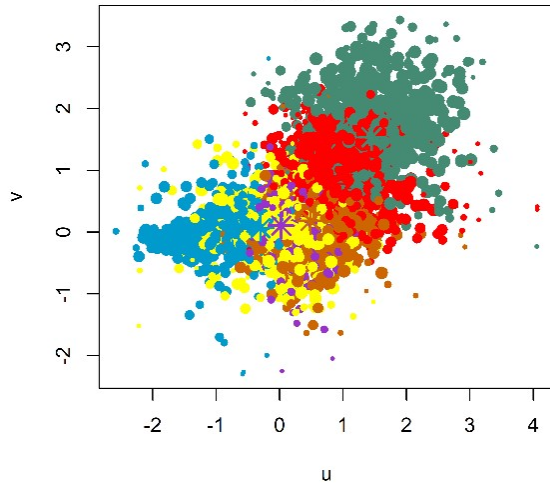

### Near

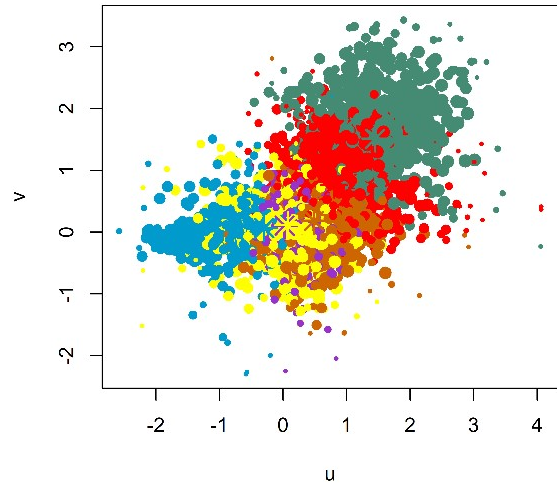

Figure S3

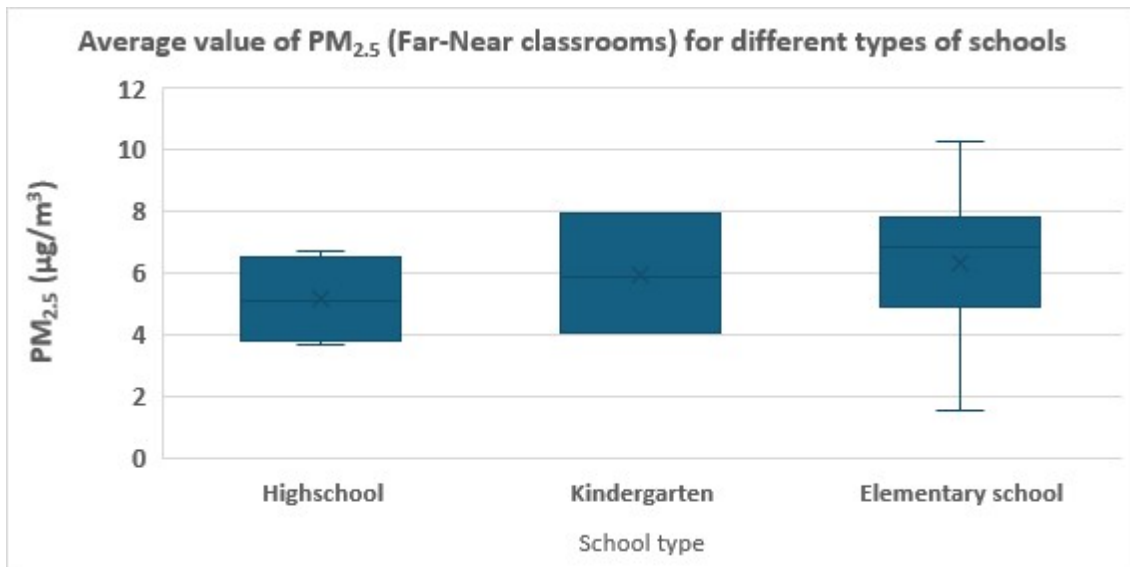

Figure S4

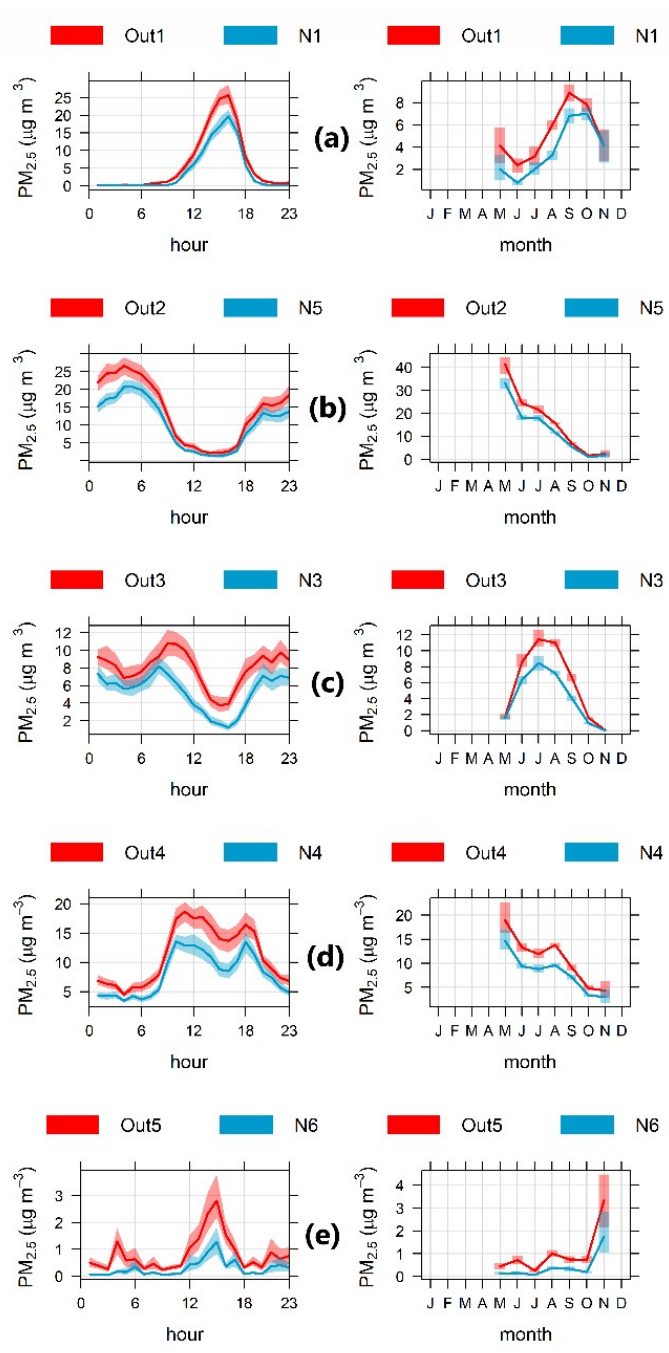

Figure S5

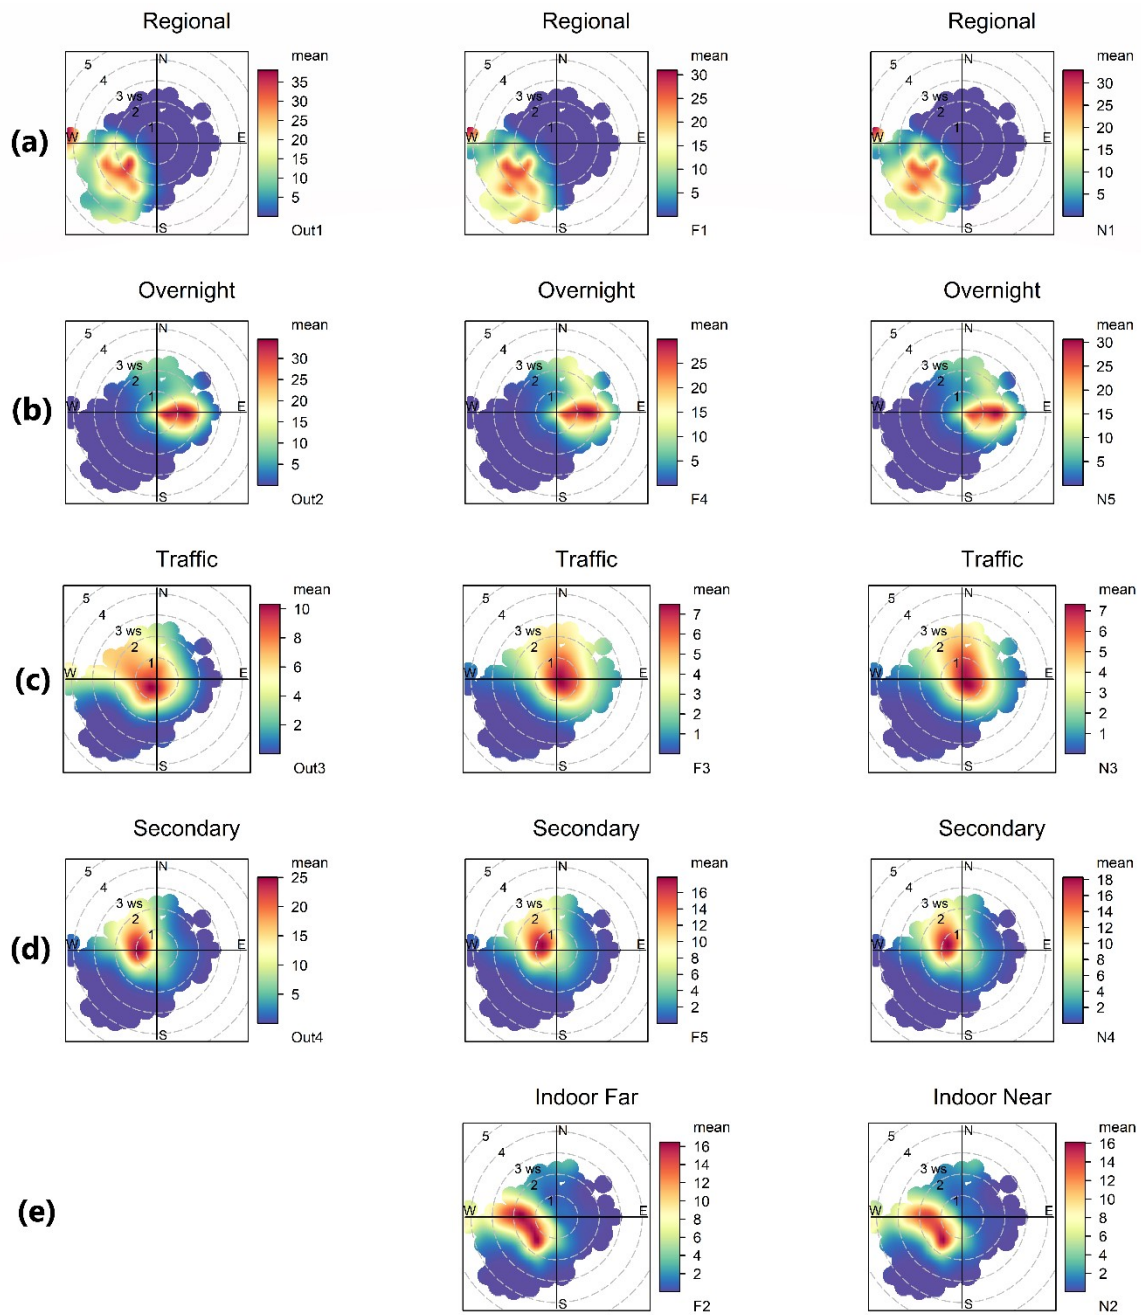

Figure S6



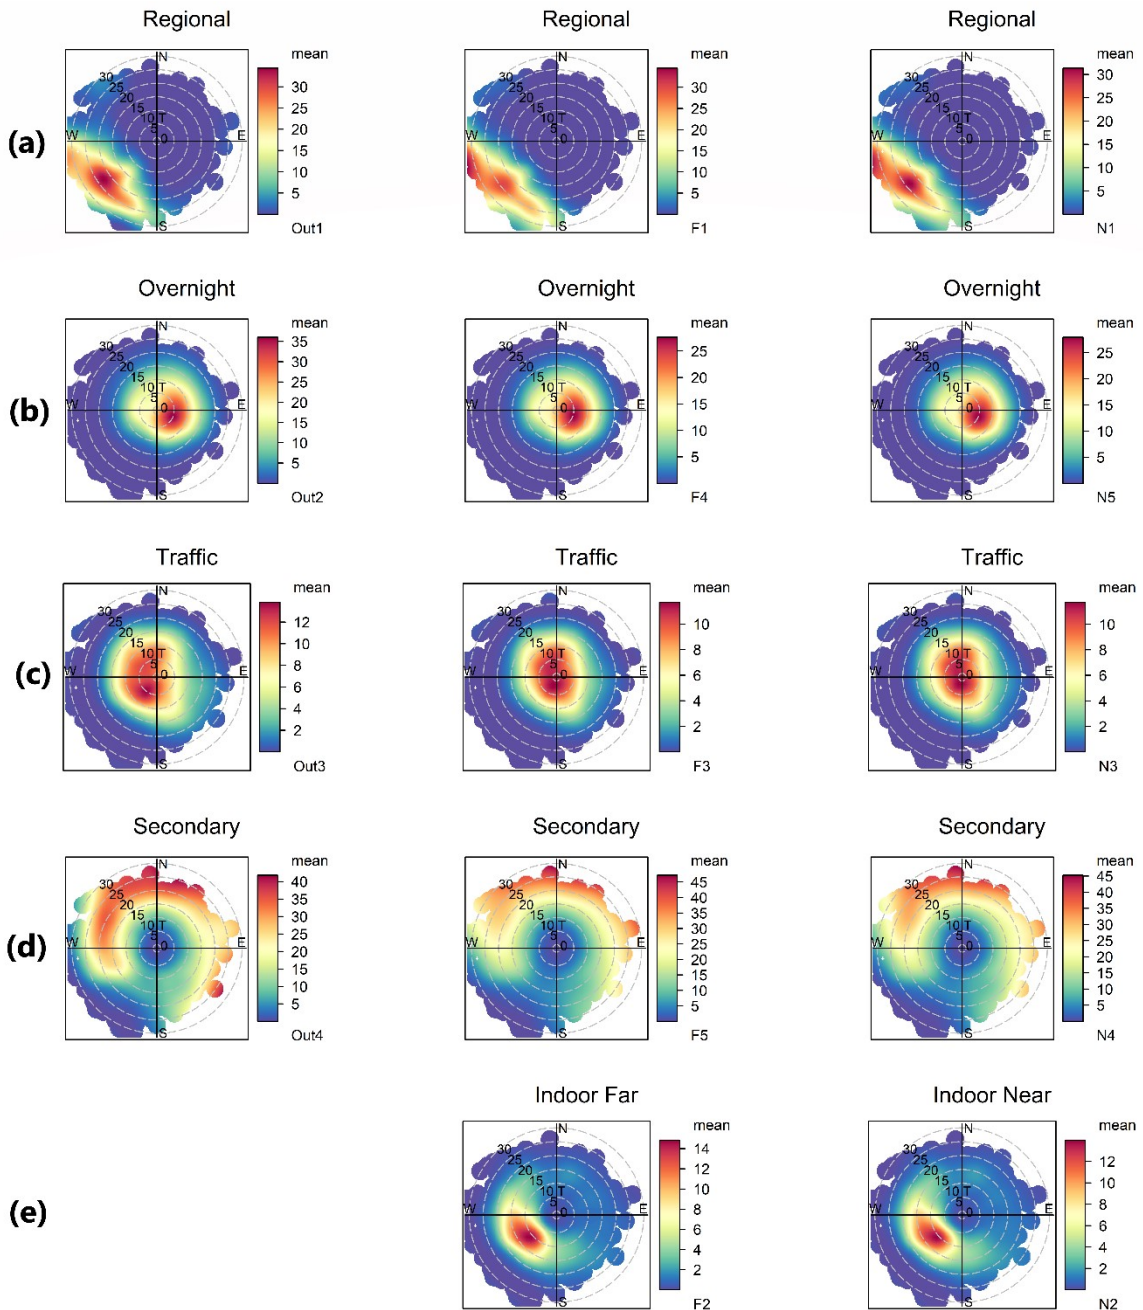

Figure S7

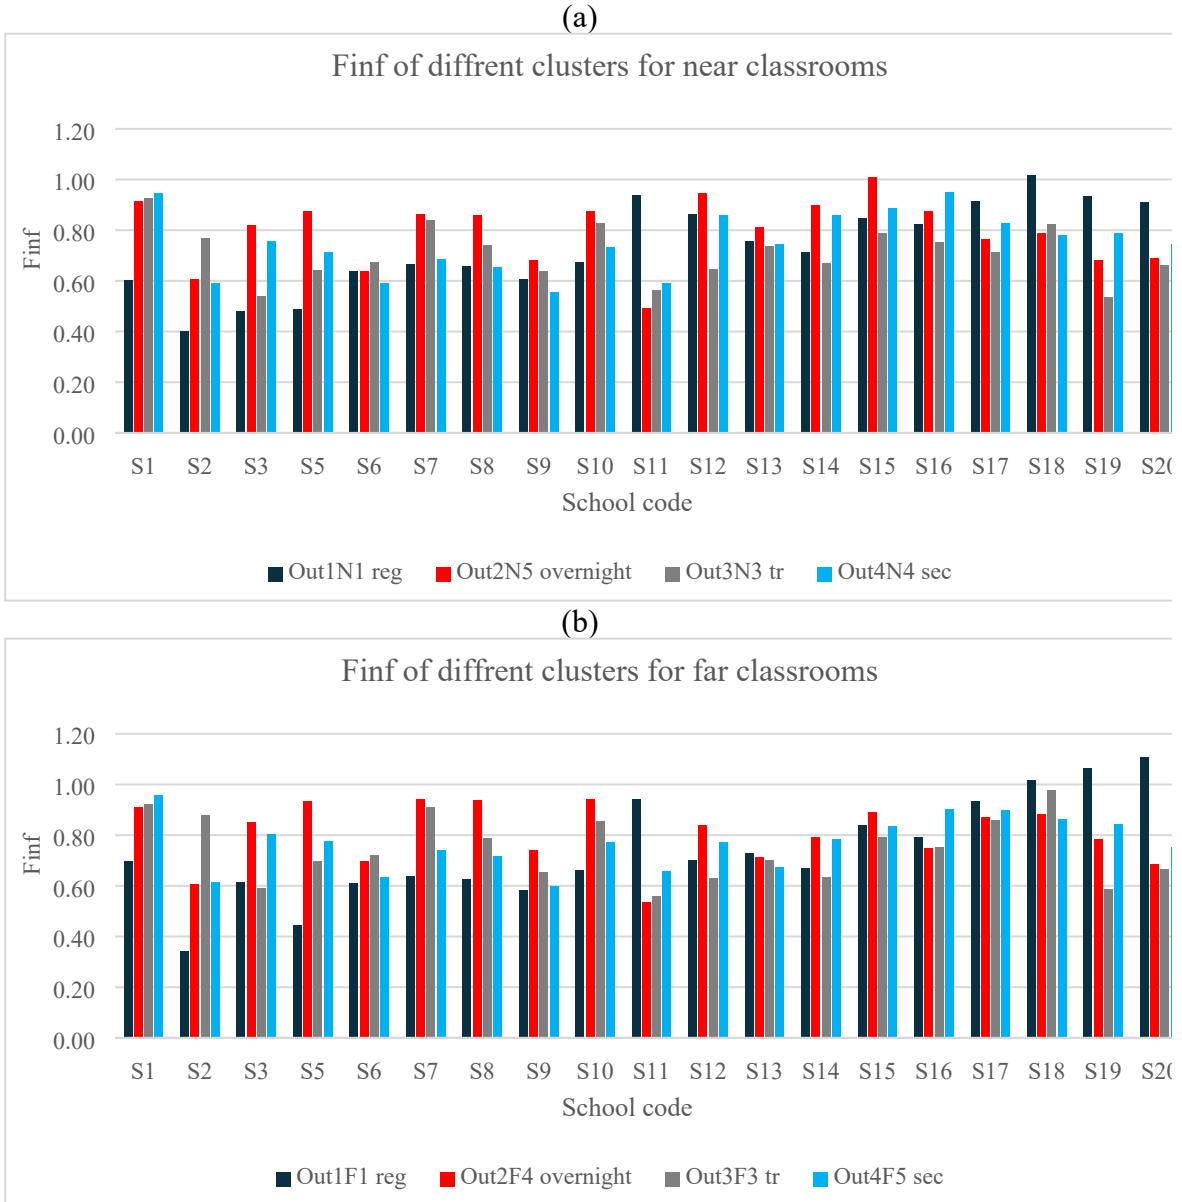

Figure S8

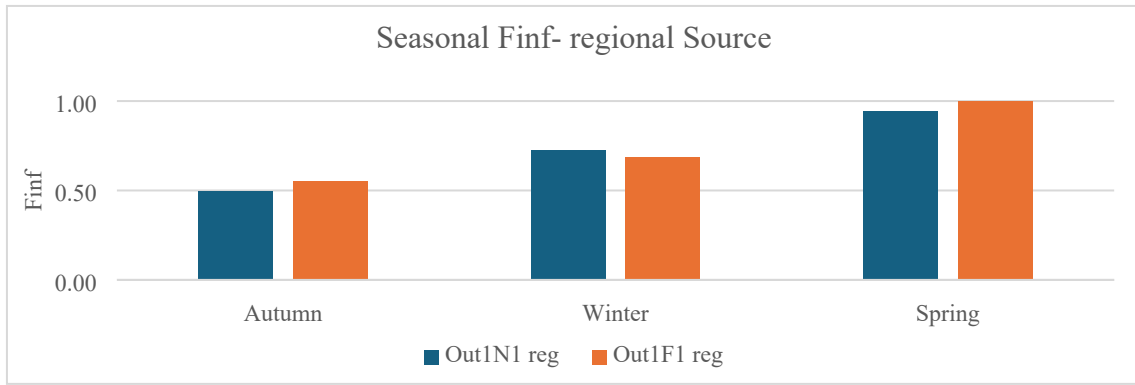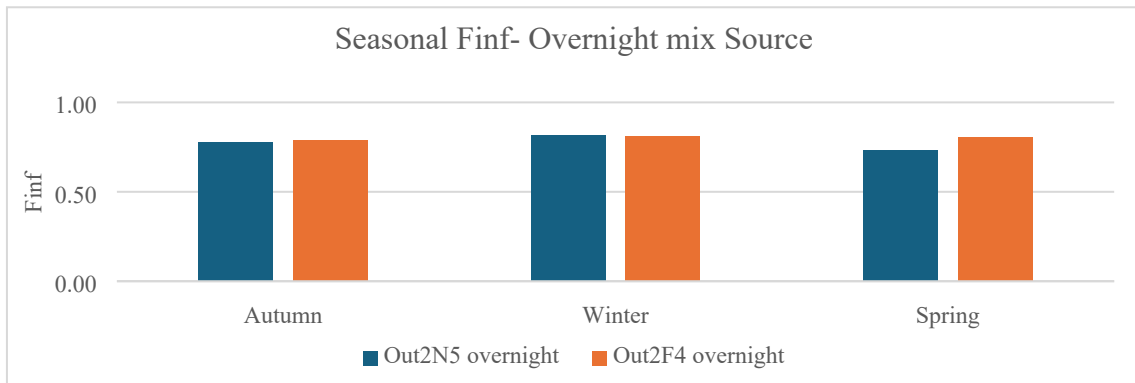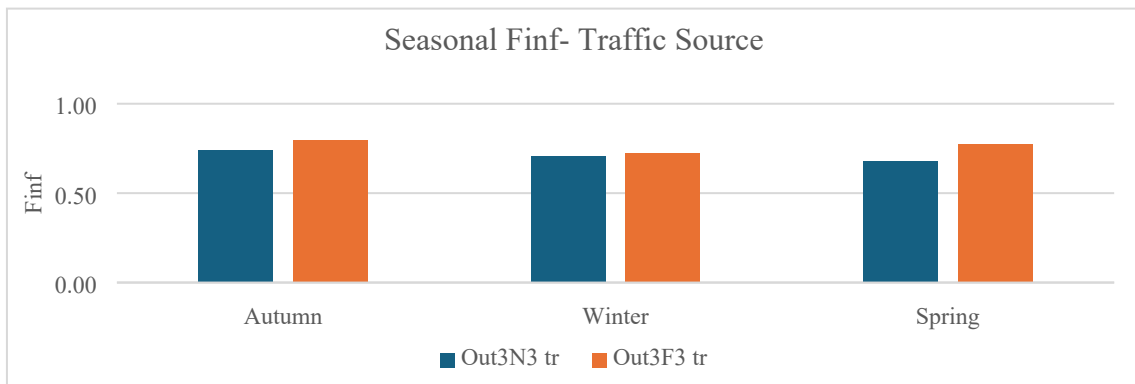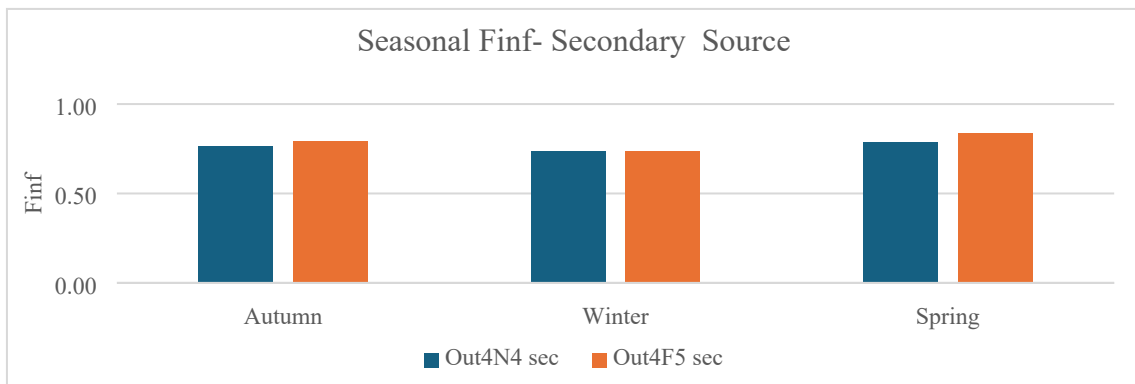

Figure S9

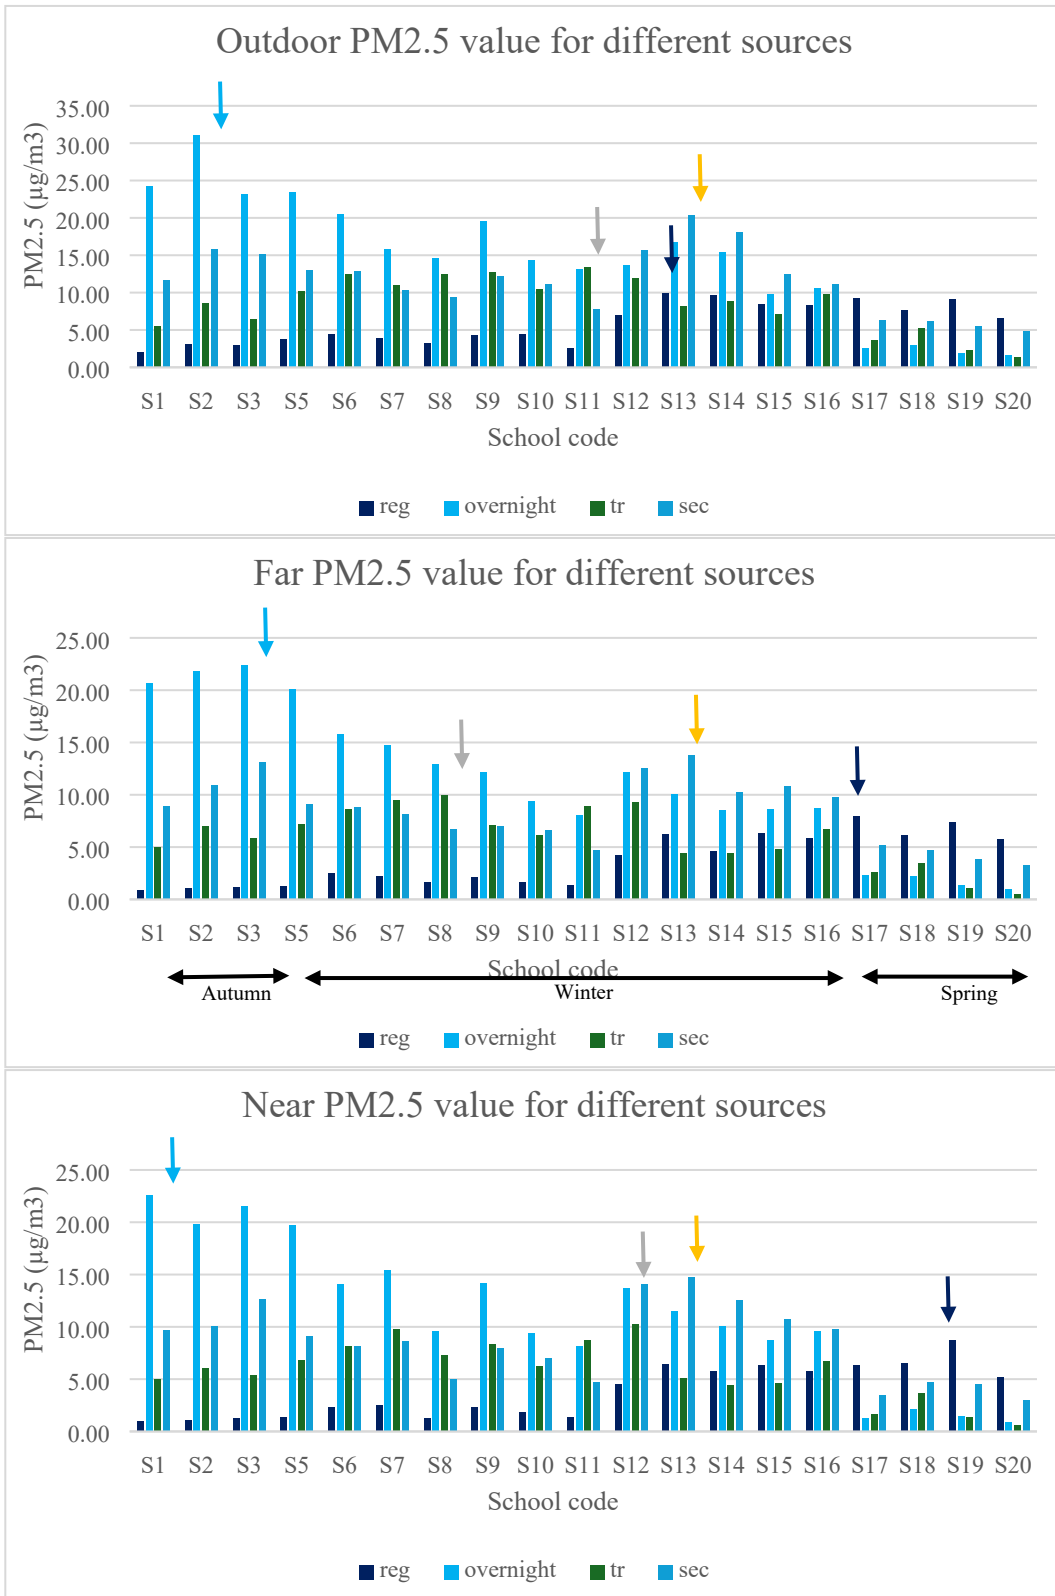

Figure S10

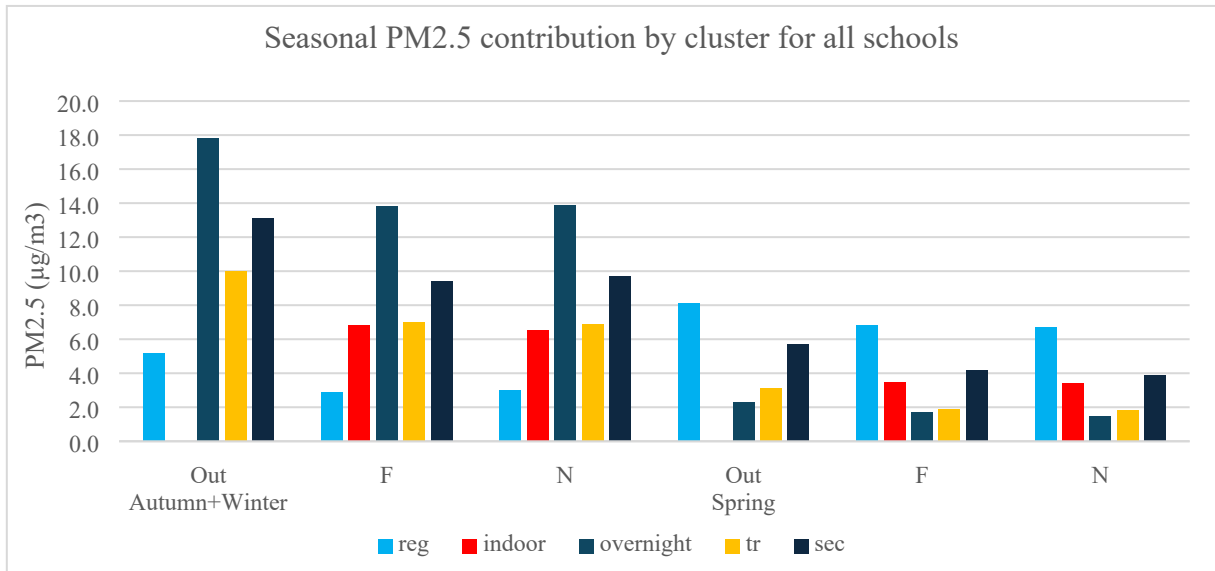

Figure S11

Table S1: Adjusted R<sup>2</sup>, Outdoor/SINCA concentration ratio and types of schools for different pairwise comparisons.

| <b>School Code</b> | <b>R<sup>2</sup><br/>Outdoor-SINCA</b> | <b>Concentration ratio<br/>Outdoor/SINCA</b> | <b>Type of school</b> |
|--------------------|----------------------------------------|----------------------------------------------|-----------------------|
| <b>S1</b>          | 0.74                                   | 1.5                                          | Highschool            |
| <b>S2</b>          | 0.61                                   | 1.2                                          | Kindergarten          |
| <b>S3</b>          | 0.57                                   | 1.4                                          | Highschool            |
| <b>S5</b>          | 0.71                                   | 1.4                                          | Elementary school     |
| <b>S6</b>          | 0.85                                   | 1.5                                          | Elementary school     |
| <b>S7</b>          | 0.69                                   | 1.3                                          | Elementary school     |
| <b>S8</b>          | 0.82                                   | 1.7                                          | Elementary school     |
| <b>S9</b>          | 0.79                                   | 1.5                                          | Elementary school     |
| <b>S10</b>         | 0.37                                   | 1.3                                          | Kindergarten          |
| <b>S11</b>         | 0.62                                   | 1.5                                          | Elementary school     |
| <b>S12</b>         | 0.73                                   | 1.3                                          | Elementary school     |
| <b>S13</b>         | 0.70                                   | 1.5                                          | Elementary school     |
| <b>S14</b>         | 0.51                                   | 1.4                                          | Highschool            |
| <b>S15</b>         | 0.74                                   | 1.3                                          | Elementary school     |
| <b>S16</b>         | 0.69                                   | 1.1                                          | Kindergarten          |
| <b>S17</b>         | 0.62                                   | 1.4                                          | Elementary school     |
| <b>S18</b>         | 0.55                                   | 0.9                                          | Highschool            |
| <b>S19</b>         | 0.65                                   | 1.3                                          | Elementary school     |
| <b>S20</b>         | 0.67                                   | 1.2                                          | Elementary school     |

Table S2: adjusted R<sup>2</sup> for paired fuzzy clusters.

| <b>School Code</b> | <b>Out1-N1 reg</b> | <b>Out2-N5 Overnight</b> | <b>Out3-N3 tr</b> | <b>Out4-N4 sec</b> | <b>Out1-F1 reg</b> | <b>Out2-F4 Overnight</b> | <b>Out3-F3 tr</b> | <b>Out4-F5 sec</b> |
|--------------------|--------------------|--------------------------|-------------------|--------------------|--------------------|--------------------------|-------------------|--------------------|
| <b>S1</b>          | 0.82               | 0.83                     | 0.86              | 0.81               | 0.73               | 0.77                     | 0.85              | 0.73               |
| <b>S2</b>          | 0.86               | 0.80                     | 0.85              | 0.80               | 0.63               | 0.76                     | 0.86              | 0.76               |
| <b>S3</b>          | 0.69               | 0.76                     | 0.54              | 0.74               | 0.57               | 0.78                     | 0.54              | 0.73               |
| <b>S5</b>          | 0.57               | 0.86                     | 0.71              | 0.73               | 0.51               | 0.88                     | 0.68              | 0.72               |
| <b>S6</b>          | 0.80               | 0.80                     | 0.58              | 0.76               | 0.76               | 0.77                     | 0.57              | 0.73               |
| <b>S7</b>          | 0.82               | 0.83                     | 0.58              | 0.79               | 0.78               | 0.83                     | 0.58              | 0.78               |
| <b>S8</b>          | 0.60               | 0.82                     | 0.59              | 0.65               | 0.57               | 0.87                     | 0.63              | 0.64               |
| <b>S9</b>          | 0.81               | 0.80                     | 0.53              | 0.76               | 0.77               | 0.78                     | 0.52              | 0.74               |
| <b>S10</b>         | 0.81               | 0.80                     | 0.58              | 0.74               | 0.78               | 0.82                     | 0.57              | 0.73               |
| <b>S11</b>         | 0.64               | 0.73                     | 0.39              | 0.61               | 0.62               | 0.66                     | 0.36              | 0.55               |
| <b>S12</b>         | 0.74               | 0.87                     | 0.68              | 0.76               | 0.70               | 0.85                     | 0.68              | 0.71               |
| <b>S13</b>         | 0.88               | 0.85                     | 0.78              | 0.83               | 0.85               | 0.84                     | 0.77              | 0.78               |
| <b>S14</b>         | 0.84               | 0.84                     | 0.73              | 0.78               | 0.80               | 0.82                     | 0.72              | 0.71               |
| <b>S15</b>         | 0.86               | 0.90                     | 0.71              | 0.87               | 0.84               | 0.90                     | 0.73              | 0.85               |
| <b>S16</b>         | 0.82               | 0.93                     | 0.71              | 0.85               | 0.78               | 0.89                     | 0.73              | 0.81               |
| <b>S17</b>         | 0.83               | 0.86                     | 0.67              | 0.72               | 0.87               | 0.95                     | 0.73              | 0.81               |
| <b>S18</b>         | 0.87               | 0.90                     | 0.73              | 0.81               | 0.88               | 0.93                     | 0.79              | 0.88               |
| <b>S19</b>         | 0.82               | 0.81                     | 0.63              | 0.77               | 0.71               | 0.93                     | 0.73              | 0.84               |
| <b>S20</b>         | 0.79               | 0.89                     | 0.68              | 0.80               | 0.68               | 0.92                     | 0.64              | 0.85               |
